1 **Title:** Efficacy of lysophosphatidylcholine as direct treatment in combination with  
2 colistin against *Acinetobacter baumannii* in murine severe infections models

3

4 **Authors:** Miró-Canturri A<sup>1,2#</sup>, Ayerbe-Algaba R<sup>1,2#</sup>, Jiménez-Mejías ME<sup>1,2\*</sup>, Pachón  
5 J<sup>2,3</sup>, Smani Y<sup>1,2\*</sup>.

6 <sup>#</sup>Andrea Miró-Canturri and Rafael Ayerbe-Algaba contributed equally to this work.  
7 Author order was determined by drawing ball.

8

9 **Affiliations:** <sup>1</sup>Clinical Unit of Infectious Diseases, Microbiology and Preventive  
10 Medicine, University Hospital Virgen del Rocío, Seville, Spain. <sup>2</sup>Institute of  
11 Biomedicine of Seville (IBiS), University Hospital Virgen del Rocío/CSIC/University  
12 of Seville, Seville, Spain. <sup>3</sup>Department of Medicine, University of Seville, Seville,  
13 Spain.

14

15 **Corresponding authors:** \*Younes Smani, Clinic Unit of Infectious Diseases,  
16 Microbiology and Preventive Medicine, Institute of Biomedicine of Seville (IBiS),  
17 University Hospital Virgen del Rocío, Av. Manuel Siurot s/n, 41013, Seville, Spain.  
18 Tel: +34-955923100, E-mail: [ysmani-ibis@us.es](mailto:ysmani-ibis@us.es)

19 \*Manuel Enrique Jiménez-Mejías, Institute of Biomedicine of Seville (IBiS), University  
20 Hospital Virgen del Rocío, Av. Manuel Siurot s/n, 41013, Seville, Spain. Tel: +34-  
21 955012185, E-mail: [mej-mejias@telefonica.net](mailto:mej-mejias@telefonica.net)

22

23 **Running title:** Therapeutic effect of LPC in combination with colistin.

24

25 **Keywords:** Lysophosphatidylcholine, colistin, direct treatment, *A. baumannii*.

26

27 **ABSTRACT**

28 **Objectives.** The stimulation of the immune response to prevent the progression of the  
29 infection may be an adjuvant to antimicrobial treatment. Previously, we showed that  
30 preemptive treatment with lysophosphatidylcholine (LPC) in combination with colistin  
31 improved the therapeutic efficacy of colistin against MDR *Acinetobacter baumannii*. In  
32 this study, we aimed to evaluate the efficacy of direct treatment with LPC in  
33 combination with colistin in murine experimental models of severe infections by *A.*  
34 *baumannii*.

35 **Methods.** We used *A. baumannii* strain Ab9, which is susceptible to colistin and most  
36 of the antibiotics used in clinical settings, and *A. baumannii* strain Ab186, which is  
37 susceptible to colistin but presents a MDR pattern. The therapeutic efficacies of one and  
38 two doses of LPC (25 mg/kg/d) and colistin (20 mg/kg/8h), alone or in combination,  
39 were assessed against Ab9 and Ab186 in murine peritoneal sepsis and pneumonia  
40 models.

41 **Results.** One and two doses of LPC in combination with colistin and colistin  
42 monotherapy enhanced bacterial clearance of Ab9 and Ab186 from spleen, lungs and  
43 blood and reduced mortality rates compared with those of the non-treated mice group in  
44 both experimental models ( $P<0.05$ ). Moreover, one and two doses of LPC reduced the  
45 bacterial concentration in tissues and blood in both models, and increased mice survival  
46 in peritoneal sepsis model for both strains compared with those of colistin monotherapy  
47 group.

48 **Conclusions.** LPC used as an adjuvant of colistin treatment may be helpful to reduce  
49 the severity and the resolution of the infection by MDR *A. baumannii*.

50

## 51 INTRODUCTION

52 *Acinetobacter baumannii* is a gram-negative bacillus with high clinical relevance owing  
53 to the increase in the number of nosocomial infections caused by this pathogen, as well  
54 as its ability to develop resistance to most antimicrobial agents used by physicians (1).  
55 Treatment of *A. baumannii* infections, especially those caused by MDR strains is a  
56 major concern. In many areas of the world that have a high prevalence of MDR *A.*  
57 *baumannii*, few options of treatment are present and last resort treatments such as  
58 colistin are no longer effective in an increasing number of cases, leading to a 28-day  
59 mortality of 43% in hospitalized patients with bacteremia, ventilator-associated or  
60 hospital acquired pneumonia, or urosepsis (2). The number of antibiotics approved by  
61 the FDA cannot keep pace with the resistance mechanisms acquired by *A. baumannii*.  
62 Therefore, the development of new strategic antimicrobial therapeutic approaches, like  
63 the use of non-antibiotics in combination with one of the scarce but clinically relevant  
64 antibiotics, has become an urgent need.

65 A therapeutic alternative for infections by MDR *A. baumannii* is immune system  
66 modulation to improve the infection clearance. We previously successfully  
67 demonstrated the efficacy of lysophosphatidylcholine (LPC), a phospholipid involved in  
68 the recruitment and stimulation of immune cells (3-6) as a preemptive treatment in  
69 murine peritoneal sepsis and pneumonia experimental models by susceptible and MDR  
70 *A. baumannii* strains (7). Of note, LPC preemptive treatment in combination with  
71 colistin, tigecycline, or imipenem treatment has improved the *in vivo* antibacterial  
72 activity of these antimicrobials in murine experimental peritoneal sepsis and pneumonia  
73 by drug-susceptible and MDR *A. baumannii* (8). In the same line, LPC preemptive  
74 treatment in combination with ceftazidime has potentiated the *in vivo* antibacterial  
75 activity of ceftazidime in these severe infections models by MDR *Pseudomonas*

76 *aeruginosa* (9). Recently, Yadav *et al.* have reported *in vitro* that LPC potentiate the  
77 effect of nonbactericidal concentration of polymixin B against the growth of  
78 *Pseudomonas aeruginosa* and *Klebsiella pneumoniae* (10).

79 Currently, there are no data regarding the efficacy of the direct treatment with LPC in  
80 combination with colistin against MDR *A. baumannii*. Therefore, the aim of this study  
81 was to evaluate the efficacy of the direct treatment with LPC in combination with  
82 colistin in murine experimental models of peritoneal sepsis and pneumonia by drug-  
83 susceptible and MDR clinical isolates of *A. baumannii*.

84

## 85 **MATERIALS AND METHODS**

86 **Bacterial strains.** Drug-susceptible *A. baumannii* (Ab9) and MDR *A. baumannii*  
87 (Ab186) (resistant to imipenem, tigecycline, ciprofloxacin and ceftazidime) clinical  
88 strains were used in this study (8). Both strains were susceptible to colistin with MIC of  
89 0.5 mg/L. The MIC of LPC against both strains was >8.000 mg/L (8). Ab9 was  
90 recovered from a wound surgical exudates, and Ab186 was recovered from blood  
91 cultures and belong to ST297 and ST2 (international clone II), respectively (8, 11).

92

93 **Antimicrobial agents and reagents.** Clinical formulation of colistin methanesulfonate  
94 (Promixin®, Spain) was used. The anesthetic was 2:1 Ketamine hydrochloride® (Pfizer,  
95 Spain):Diazepam ® (Roche, Spain).

96

97 **Animals.** Immunocompetent C57BL/6 female mice weighing 18 to 20 g (Production  
98 and Experimentation Animal Center, University of Seville, Seville, Spain) were used.  
99 Animals were housed in regulation boxes and given free access to food and water. This  
100 study was carried out in strict accordance with the recommendations in the *Guide for*

101 *the Care and Use of Laboratory Animals* (12). The protocol was approved by the  
102 Committee on the Ethics of Animal Experiments of the University Hospital of Virgen  
103 del Rocío of Seville, Spain (approval 1556-N-16).

104

105 **Experimental murine model of peritoneal sepsis.** A previously characterized murine  
106 model of peritoneal sepsis caused by *A. baumannii* was used (8). Briefly, animals were  
107 inoculated intraperitoneally (ip.) with 0.5 mL of the 100% minimal lethal dose  
108 (MLD<sub>100</sub>) of the Ab9 (5.9 log<sub>10</sub> CFU/mL) or Ab186 (5 log<sub>10</sub> CFU/mL), mixed 1:1 with  
109 10% porcine mucin (Sigma, Spain). LPC (Sigma, Spain) and colistin treatments were  
110 administered 4 h after bacterial inoculation. Groups of mice were randomly ascribed to  
111 the following groups: (i) controls (without treatment), (ii) LPC administered once i.p at  
112 25 mg/kg 4 h after bacterial inoculation, (iii) colistin administered i.p at 20 mg/kg/8 h  
113 for 72 h (8) and (iv) the combination of colistin at 20 mg/kg/8 h with one dose of LPC  
114 at 25 mg/kg/d, and (v) the combination of colistin at 20 mg/kg/8 h with two doses of  
115 LPC at 25 mg/kg/d (first and second at 4 and 28 h, respectively, after bacterial  
116 infection).

117 Mortality was recorded over 72 h. After the death or the euthanization of the mice by  
118 sodium thiopental (Zambon S.p.A., Italy) at the end of the experiment period, aseptic  
119 thoracotomies were performed, and blood samples were obtained by cardiac puncture.  
120 Spleen and lungs were aseptically removed and homogenized (Stomacher 80®; Tekman  
121 Co.) in 2 mL of sterile 0.9% NaCl solution. Tenfold dilution of the homogenized spleen  
122 and lungs, and blood obtained by cardiac puncture, were plated onto sheep agar for the  
123 quantitative cultures (to determine the log<sub>10</sub> CFU/g of spleen and lungs and log<sub>10</sub>  
124 CFU/mL of blood).

125

126 **Experimental murine model of pneumonia.** A previously described experimental  
127 murine pneumonia model was used to evaluate the efficacy of LPC as monotherapy and  
128 in combination with colistin against Ab9 and Ab186 strains (8). Briefly, the mice were  
129 anesthetized by 2:1 Ketamine hydrochloride:Diazepam, suspended vertically, and the  
130 trachea of each was then cannulated with a blunt-tipped metal needle. The feel of the  
131 needle tip against the tracheal cartilage confirmed the intratracheal location. A  
132 microliter syringe (Hamilton Co., Reno, NV) was used for the inoculation of 50  $\mu\text{L}$  of  
133 bacterial suspension (10 and 9  $\log_{10}$  CFU/mL for Ab9 and Ab186 strains, respectively)  
134 which had been grown for 24 h in LB broth at 37°C and mixed at a 1:1 ratio with 0.9%  
135 NaCl solution containing 10% (wt/vol) porcine mucin. The mice remained in a vertical  
136 position for 3 min and then in a 30° position until they awakened. Treatment groups  
137 were similar to those for the experimental model of peritoneal sepsis. After death or  
138 sacrifice of the mice at the end of the experimental period, aseptic thoracotomies were  
139 performed, and blood was obtained by cardiac puncture and lungs were aseptically  
140 removed and homogenized. Quantitative data was obtained as described above to  
141 determine the  $\log_{10}$  CFU/g of lungs and  $\log_{10}$  CFU/mL of blood and mice mortality was  
142 recorded over 72 h.

143

144 **Statistical analysis.** Group data are presented as means  $\pm$  standard errors of the means  
145 (SEM). Differences in the bacterial spleen, lung and blood concentrations (mean  $\pm$  SEM  
146 log CFU per gram of tissue or per ml of blood) were assessed by analysis of variance  
147 (ANOVA) and the post hoc Dunnett test Differences in mortality (%) and blood  
148 sterility (%) between groups were compared by  $\chi^2$  test. *P* values of <0.05 were  
149 considered significant. The SPSS (version 23.0; SPSS Inc.) statistical package was used.

150

151 **RESULTS**

152 **Efficacy of LPC in combination with colistin in murine experimental model of**  
153 **peritoneal sepsis.** The efficacies of colistin and LPC in monotherapies and in  
154 combination against Ab9 and Ab186, expressed as survival and bacterial concentrations  
155 in spleen, lungs and blood, are shown in the tables 1 and 2.

156 **(i) Survival.** Tables 1 and 2 show that colistin alone and in combination with one and  
157 two doses of LPC increased mice survival compared with that of the control group for  
158 Ab9 and Ab186 ( $P<0.05$ ). In contrast, LPC in monotherapy did not reduce mice  
159 mortality.

160 **(ii) Bacterial clearance from spleen, lungs and blood.** Tables 1 and 2 show that  
161 monotherapy with colistin cleared Ab9 and Ab186 from the spleen, lungs and blood by  
162 5.07 and 5.68  $\log_{10}$  CFU/g, and 5.33  $\log_{10}$  CFU/mL ( $P<0.05$ ; Ab9), respectively, and  
163 6.93 and 6.73 CFU/g, 6.7  $\log_{10}$  CFU/mL ( $P<0.05$ ; Ab186), respectively, compared with  
164 the levels of the control group. One dose of LPC in combination with colistin decreased  
165 spleen, lungs and blood concentrations of Ab9 and Ab186 by 5.57 and 6.02  $\log_{10}$   
166 CFU/g, and 5.67  $\log_{10}$  CFU/mL ( $P<0.05$ ; Ab9) respectively, and 8.21 and 8.2  $\log_{10}$   
167 CFU/g, and 8.67  $\log_{10}$  CFU/mL ( $P<0.05$ ; Ab186), respectively, compared with the  
168 levels for the control group. In addition, the increase of the dose of LPC has slightly  
169 increased the bacterial clearance. Two doses of LPC in combination with colistin  
170 reduced the bacterial burden in spleen, lungs and blood by 6.13 and 6.72  $\log_{10}$  CFU/g,  
171 and 6.74  $\log_{10}$  CFU/mL ( $P<0.05$ ; Ab9), respectively, and 9.57 and 8.88  $\log_{10}$  CFU/g,  
172 and 8.81 CFU/mL ( $P<0.05$ ; Ab186), respectively, compared with the levels for the  
173 control group. Of note, one dose of LPC in combination with colistin decreased spleen,  
174 lungs and blood concentrations of Ab9 and Ab186 by 5.84 and 5.86  $\log_{10}$  CFU/g, and  
175 6.28  $\log_{10}$  CFU/mL, respectively ( $P<0.05$ ; Ab9), and 8.9 and 8.6  $\log_{10}$  CFU/g, and 9.07



176  $\log_{10}$  CFU/mL ( $P<0.05$ ; Ab186), respectively, compared with the levels for the LPC  
177 monotherapy group. Finally, two doses of LPC in combination with colistin decreased  
178 spleen, lungs and blood concentrations for Ab9 and Ab186 by 6.4 and 6.56  $\log_{10}$  CFU/g,  
179 and 6.74  $\log_{10}$  CFU/mL ( $P<0.05$ ; Ab9), respectively, and 10.26 and 9.28  $\log_{10}$ CFU/mL,  
180 and 9.21  $\log$  CFU/mL ( $P<0.05$ ; Ab186), respectively, when compared with the levels  
181 for the LPC monotherapy.

182

183 **Efficacy of LPC in combination with colistin in murine experimental model of**  
184 **pneumonia.** The efficacies of colistin and LPC in monotherapies and in combination  
185 against Ab9 and Ab186, expressed as survival and bacterial concentrations in spleen,  
186 lungs and blood, are shown in the tables 3 and 4.

187 **(i) Survival.** Tables 3 and 4 show that colistin alone and in combination with one and  
188 two doses of LPC increased mice survival compared with that of the control group for  
189 Ab9 and Ab186 ( $P<0.05$ ). In contrast, LPC in monotherapy did not reduce mice  
190 mortality.

191 **(ii) Bacterial clearance of lungs and blood.** Tables 3 and 4 show that monotherapy  
192 with colistin cleared Ab9 and Ab186 from the lungs and blood by 6.53 and 5.81  $\log_{10}$   
193 CFU/g and mL ( $P<0.05$ ; Ab9), respectively, and 7.75 and 6.79  $\log_{10}$  CFU/g and mL  
194 ( $P<0.05$ ; Ab186), respectively, compared with the levels of the control group. One dose  
195 of LPC in combination with colistin decreased lungs and blood concentrations of Ab9  
196 and Ab186 by 6.76 and 6.08  $\log_{10}$  CFU/g and mL ( $P<0.05$ ; Ab9) respectively, and 8.1  
197 and 7.17  $\log_{10}$  CFU/g and mL ( $P<0.05$ ; Ab186), respectively, compared with the levels  
198 for the control group. In addition, the increase of the dose of LPC has slightly increased  
199 the bacterial clearance. Two doses of LPC in combination with colistin reduced the  
200 bacterial burden in lungs and blood by 7.74 and 6.64  $\log_{10}$  CFU/g and mL ( $P<0.05$ ;

201 Ab9), respectively, and 8.56 and 7.33 CFU/g and mL ( $P<0.05$ ; Ab186), respectively,  
202 compared with the levels for the control group.

203 Finally, one and two doses of LPC in combination with colistin decreased the lungs  
204 concentrations of Ab9 by 6.25 and 7.25  $\log_{10}$  CFU/g ( $P<0.05$ ) and Ab186 by 7.9 and  
205 8.36  $\log_{10}$  CFU/g ( $P<0.05$ ), compared with the levels for the LPC monotherapy. Similar  
206 results were observed in blood with a reduction of 5.4 and 5.95  $\log_{10}$  CFU/mL ( $P<0.05$ ;  
207 Ab9), and 6.74 and 6.9  $\log_{10}$  CFU/mL ( $P<0.05$ ; Ab186) compared with the levels for the  
208 LPC monotherapy.

209

## 210 **DISCUSSION**

211 Previous studies from our group demonstrated that preemptive LPC monotherapy and in  
212 combination with antibiotics such as colistin reduced bacterial tissues loads and  
213 bacteremia and increased mice survival in murine experimental models of severe  
214 infections by *A. baumannii* (7, 8). Even though LPC as preemptive monotherapy and in  
215 combination with colistin presented remarkable results, we hypothesized that it may be  
216 given as direct treatment in combination with colistin.

217 Currently, colistin is among the last treatments available worldwide, being a last resort  
218 against MDR *A. baumannii* strains. Nevertheless, its therapeutic efficacy using optimal  
219 doses is limited, being effective just in the 60% of patients infected with a MDR strain  
220 susceptible to colistin (13, 14). For that reason, two different clinical isolates have been  
221 chosen, one drug-susceptible and one MDR, both susceptible to colistin. In the present  
222 study, monotherapy with colistin against drug-susceptible and MDR *A. baumannii*  
223 strains significantly reduced bacterial concentrations in spleen, lungs and blood and  
224 increased mice survival comparing with the control group. However, it is important to  
225 highlight that colistin monotherapy presented a mortality rate of 75% in the case of the

226 MDR strain in the peritoneal sepsis model. This result revealed a failure in the treatment  
227 with colistin, and the mice survival values are similar and even higher to the rates  
228 obtained in the clinical practice when dealing with a colistin-susceptible strain with  
229 highly resistant pattern. Accordingly with our hypothesis, treatment with one or two  
230 doses of LPC in combination with colistin in a peritoneal sepsis model increased  
231 (without statistical difference) mice survival and reduced bacterial loads in tissues and  
232 blood, comparing with colistin monotherapy. No differences were found between a  
233 single dose and multiple doses of LPC. It is noteworthy to mention that higher efficacy  
234 of the combination LPC plus colistin was observed against the MDR strain Ab186,  
235 where survival rates were markedly increased. In the case of the pneumonia model, no  
236 differences were found in survival rates comparing with colistin monotherapy but a  
237 decrease in lungs and blood bacterial concentrations were observed.

238 Differences in bacterial concentrations were not due to different pharmacokinetic  
239 parameters between strains, since the MIC value of colistin for both strains is 0.5 mg/l.  
240 Different response to the colistin treatment may be explained by immune responses  
241 caused by both strains. Indeed, Ab9 induced more TNF- $\alpha$  release than that of the  
242 Ab186 (8). Other studies reported by our group showed that a drug-susceptible *A.*  
243 *baumannii* strain induced more TNF- $\alpha$  and interleukin 6 releases than MDR and pan-  
244 drug resistant *A. baumannii* clinical isolates (15, 16). In line with this hypothesis,  
245 increased lethality and severity of the infection by *A. baumannii* was observed when  
246 neutrophils are depleted, together with a delayed production of cytokines involved in  
247 neutrophil function such as TNF- $\alpha$ , interleukin 1, keratinocyte chemoattractant protein  
248 (KC/CXCL1) and macrophage inflammatory protein (MIP-1) (17). Neutrophils are  
249 essential players during *A. baumannii* infection and present an important role against  
250 sepsis and pneumonia infection (18, 19). It was reported that LPC blocks neutrophil

251 deactivation during murine cecal ligation and puncture model as well as increased the  
252 bactericidal activity of these immune cells (20). Thus, the additive action of LPC to the  
253 antibiotic treatment may be due to enhanced activity of neutrophils.

254 Interestingly, direct treatment with LPC in combination with colistin presents similar  
255 efficacy than preemptive treatment with LPC in combination with colistin against MDR  
256 Ab186 strain. A reduction of the bacterial burden in spleen and lungs around 2 log<sub>10</sub>  
257 CFU/g in a murine model of peritoneal sepsis and pneumonia models comparing with  
258 the LPC in combination with colistin preemptive treatment was observed (8). This  
259 comparison increases the interest towards LPC as a future adjuvant therapy with  
260 colistin, which may reduce the apparition of resistance to antibiotics (21).

261 In summary, the present study suggests that direct treatment with LPC in combination  
262 with colistin improves the *in vivo* antibacterial activity in murine experimental models  
263 of peritoneal sepsis and pneumonia by MDR *A. baumannii*.

264

## 265 **ACKNOWLEDGEMENTS**

266 This study was supported by the Instituto de Salud Carlos III, Proyectos de  
267 Investigación en Salud (grants PI13/01744, PI16/01306 and PI16/01378) and by Plan  
268 Nacional de I+D+i 2013-2016 and Instituto de Salud Carlos III, Subdirección General  
269 de Redes y Centros de Investigación Cooperativa, Ministerio de Ciencia, Inno-vación y  
270 Universidades, Spanish Network for Research in Infectious Diseases (REIPI  
271 RD16/0016/0009) –co- financed by European Development Regional Fund “A way to  
272 achieve Europe”, Operative program Intelligent Growth 2014-2020. Younes Smani is  
273 supported by the Subprograma Miguel Servet Tipo I from the Ministerio de Economía y  
274 Competitividad of Spain (CP15/01358).

275

276 **REFERENCES**

- 277 1. **Sazly Lim SM, Sime FB, Roberts JA.** 2019. Multidrug-resistant *Acinetobacter*  
278 *baumannii* infections: Current evidence on treatment options and the role of  
279 pharmacokinetics/pharmacodynamics in dose optimisation. *Int J Antimicrob*  
280 *Agents* **53**: 726-745.
- 281 2. **Paul M, Daikos GL, Durante-Mangoni E, Yahav D, Carmeli Y, Benattar YD,**  
282 **Skiada A, Andini R, Eliakim-Raz N, Nutman A, Zusman O, Antoniadou A,**  
283 **Pafundi PC, Adler A, Dickstein Y, Pavleas I, Zampino R, Daitch V, Bitterman**  
284 **R, Zayyad H, Koppel F, Levi I, Babich T, Friberg LE, Mouton JW,**  
285 **Theuretzbacher U, Leibovici L.** 2018. Colistin alone versus colistin plus  
286 meropenem for treatment of severe infections caused by carbapenem-resistant  
287 Gram-negative bacteria: an open-label, randomised controlled trial. *Lancet Infect*  
288 *Dis* **18**: 391-400.
- 289 3. **Mesquita RD, Carneiro AB, Bafica A, Gazos-Lopes F, Takiya CM, Souto-**  
290 **Padron T, Vieira DP, Ferreira-Pereira A, Almeida IC, Figueiredo RT, Porto**  
291 **BN, Bozza MT, Graça-Souza AV, Lopes AH, Atella GC, Silva-Neto MA.** 2008.  
292 *Trypanosoma cruzi* infection is enhanced by vector saliva through  
293 immunosuppressant mechanisms mediated by lysophosphatidylcholine. *Infect*  
294 *Immun* **76**: 5543-5552.
- 295 4. **Quinn MT, Parthasarathy S, Steinberg D.** 1998. Lysophosphatidylcholine: a  
296 chemotactic factor for human monocytes and its potential role in atherogenesis.  
297 *Proc Natl Acad Sci U S A* **85**: 2805-2809.
- 298 5. **Sakai M, Miyazaki A, Hakamata H, Kodama T, Suzuki H, Kobori S, Shichiri**  
299 **M, Horiuchi S.** 1996. The scavenger receptor serves as a route for internalization

- 300 of lysophosphatidylcholine in oxidized low density lipoprotein-induced  
301 macrophage proliferation. *J Biol Chem* **271**: 27346-27352.
- 302 6. **Lauber K, Bohn E, Kröber SM, Xiao YJ, Blumenthal SG, Lindemann RK,**  
303 **Marini P, Wiedig C, Zobywalski A, Baksh S, Xu Y, Autenrieth IB, Schulze-**  
304 **Osthoff K, Belka C, Stuhler G, Wesselborg S.** 2003. Apoptotic cells induce  
305 migration of phagocytes via caspase-3-mediated release of a lipid attraction signal.  
306 *Cell* **113**: 717-730.
- 307 7. **Smani Y, Domínguez-Herrera J, Ibáñez-Martínez J, Pachón J.** 2015.  
308 Therapeutic efficacy of lysophosphatidylcholine in severe infections caused by  
309 *Acinetobacter baumannii*. *Antimicrob Agents Chemother* **59**: 3920-3924.
- 310 8. **Parra Millán R, Jiménez Mejías ME, Sánchez Encinales V, Ayerbe Algaba R,**  
311 **Gutiérrez Valencia A, Pachón Ibáñez ME, Díaz C, Pérez del Palacio J, López**  
312 **Cortés LF, Pachón J, Smani Y.** 2016. Efficacy of lysophosphatidylcholine in  
313 combination with antimicrobial agents against *Acinetobacter baumannii* in  
314 experimental murine peritoneal sepsis and pneumonia models. *Antimicrob Agents*  
315 *Chemother* **60**: 4464-4470.
- 316 9. **Parra-Millán R, Jiménez-Mejías ME, Ayerbe-Algaba R, Domínguez-Herrera**  
317 **J, Díaz C, Pérez Del Palacio J, Pachón J, Smani Y.** 2020. Impact of the immune  
318 response modification by lysophosphatidylcholine in the efficacy of antibiotic  
319 therapy of experimental models of peritoneal sepsis and pneumonia by  
320 *Pseudomonas aeruginosa*: LPC therapeutic effect in combined therapy. *Enferm*  
321 *Infec Microbiol Clin* **13**: S0213-005X(20)30233-0.
- 322 10. **Yadav J, Ismaeel S, Qadri A.** 2020. Lysophosphatidylcholine potentiates  
323 antibacterial activity of polymixin B. *Antimicrob Agents Chemother* **64**: e01337-  
324 20.

- 325 11. **Fernández-Cuenca F, Tomás-Carmona M, Caballero-Moyano F, Bou G,**  
326 **Martínez-Martínez L, Vila J, Pachón J, Miguel Cisneros J, Rodríguez-Baño J,**  
327 **Pascual A.** 2013. *In vitro* activity of 18 antimicrobial agents against clinical  
328 isolates of *Acinetobacter* spp.: multicenter national study GEIH-REIPI-Ab 2010.  
329 *Enferm Infecc Microbiol Clin* **31**: 4-9.
- 330 12. **National Research Council.** 2011. Guide for the care and use of laboratory  
331 animals, 8th ed. National Academies Press, Washington, DC.
- 332 13. **Garnacho-Montero J, Ortiz-Leyba C, Jiménez-Jiménez FJ, Barrero-**  
333 **Almodóvar AE, García-Garmendia JL, Bernabeu-Wittell M, Gallego-Lara SL,**  
334 **Madrazo-Osuna J.** 2003. Treatment of multidrug-resistant *Acinetobacter*  
335 *baumannii* ventilator-associated pneumonia (VAP) with intravenous colistin: a  
336 comparison with imipenem-susceptible VAP. *Clin Infect Dis* **36**: 1111-1118.
- 337 14. **Markou N, Markantonis SL, Dimitrakis E, Panidis D, Boutzouka E, Karatzas**  
338 **S, Rafailidis P, Haralampos Apostolakos, George Baltopoulos.** 2008. Colistin  
339 serum concentrations after intravenous administration in critically ill patients with  
340 serious multidrug-resistant, Gram negative bacilli infections: a prospective, open-  
341 label, uncontrolled study. *Clin Ther* **30**: 143-151.
- 342 15. **Smani Y, Domínguez-Herrera J, Pachón J.** 2011. Rifampin protects human lung  
343 epithelial cells against cytotoxicity induced by clinical multi and pandrug-resistant  
344 *Acinetobacter baumannii*. *J Infect Dis* **203**: 1110-1119.
- 345 16. **Smani Y, Docobo-Pérez F, McConnell MJ, Pachón J.** 2011. *Acinetobacter*  
346 *baumannii*-induced lung cell death: role of inflammation, oxidative stress and  
347 cytosolic calcium. *Microb Pathog* **50**: 224-232.

- 348 17. **García-Patiño MG, García-Contreras R and Licona-Limón P.** 2017. The  
349 immune response against *Acinetobacter baumannii*, an emerging pathogen in  
350 nosocomial infections. *Front Immunol* **8**: 441.
- 351 18. **van Faassen H, KuoLee R, Harris G, Zhao X, Conlan JW, Chen W.** 2007.  
352 Neutrophils play an important role in host resistance to respiratory infection with  
353 *Acinetobacter baumannii* in mice. *Infect Immun* **75**: 5597-5608.
- 354 19. **Breslow JM, Meissler JJ Jr, Hartzell RR, Spence PB, Truant A, Gaughan J,**  
355 **Eisenstein TK.** 2011. Innate immune responses to systemic *Acinetobacter*  
356 *baumannii* infection in mice: neutrophils, but not interleukin-17, mediate host  
357 resistance. *Infect Immun* **79**: 3317-3327.
- 358 20. **Yan JJ, Jung JS, Lee JE, Lee J, Huh SO, Kim HS, Jung KC, Cho JY, Nam JS,**  
359 **Suh HW, Kim YH, Song DK.** 2004. Therapeutic effects of  
360 lysophosphatidylcholine in experimental sepsis. *Nat Med* **10**: 161-167.
- 361 21. **Davies J, Davies D.** 2010. Origins and Evolution of Antibiotic Resistance.  
362 *Microbiol Mol Biol Rev* **74**: 417-433.
- 363



364 **TABLES**

365

366 **Table 1.** Therapeutic effect of one or two doses of LPC in combination with colistin in murine model of peritoneal sepsis with *A. baumannii*  
 367 Ab9.

| <b>Treatment</b>  | <b><i>n</i></b> | <b>Spleen<br/>(log<sub>10</sub> CFU/g)</b> | <b>Lung<br/>(log<sub>10</sub> CFU/g)</b> | <b>Blood<br/>(log<sub>10</sub> CFU/ml)</b> | <b>Mortality<br/>(%)</b> |
|-------------------|-----------------|--------------------------------------------|------------------------------------------|--------------------------------------------|--------------------------|
| <b>CTL</b>        | 10              | 9.55 ± 0.09                                | 9.85 ± 0.72                              | 8.59 ± 0.04                                | 100                      |
| <b>LPC</b>        | 8               | 9.82 ± 0.08                                | 9.69 ± 0.91                              | 9.20 ± 0.04 <sup>a</sup>                   | 100                      |
| <b>CST</b>        | 8               | 4.48 ± 0.30 <sup>a,b</sup>                 | 4.17 ± 0.29 <sup>a</sup>                 | 3.26 ± 0.40 <sup>a,b</sup>                 | 25 <sup>a</sup>          |
| <b>LPC1 + CST</b> | 8               | 3.98 ± 0.66 <sup>a,b</sup>                 | 3.83 ± 0.65 <sup>a</sup>                 | 2.92 ± 0.58 <sup>a,b</sup>                 | 0 <sup>a</sup>           |
| <b>LPC2 + CST</b> | 8               | 3.42 ± 0.50 <sup>a,b</sup>                 | 3.13 ± 0.46 <sup>a</sup>                 | 1.85 ± 0.38 <sup>a,b</sup>                 | 0 <sup>a</sup>           |

368 CTL, control (no treatment); LPC, lysophosphatidylcholine; CST, colistin; LPC1, one dose of lysophosphatidylcholine; LPC2 two doses of  
 369 lysophosphatidylcholine.

370 <sup>a</sup> *P*<0.05 compared to the controls

371 <sup>b</sup> *P*<0.05 compared to LPC group

372

373

374 **Table 2.** Therapeutic effect of one or two doses of LPC in combination with colistin in murine model of peritoneal sepsis with *A. baumannii*  
 375 Ab186.

| <b>Treatment</b>  | <b><i>n</i></b> | <b>Spleen<br/>(log<sub>10</sub> CFU/g)</b> | <b>Lung<br/>(log<sub>10</sub> CFU/g)</b> | <b>Blood<br/>(log<sub>10</sub> CFU/ml)</b> | <b>Mortality<br/>(%)</b> |
|-------------------|-----------------|--------------------------------------------|------------------------------------------|--------------------------------------------|--------------------------|
| <b>CTL</b>        | 13              | 9.79 ± 0.06                                | 9.63 ± 0.13                              | 8.89 ± 0.03                                | 100                      |
| <b>LPC</b>        | 8               | 10.48 ± 0.03                               | 10.03 ± 0.03                             | 9.29 ± 0.03                                | 100                      |
| <b>CST</b>        | 8               | 2.86 ± 1.54 <sup>a,b</sup>                 | 2.90 ± 1.57 <sup>a,b</sup>               | 2.19 ± 1.63 <sup>a,b</sup>                 | 75                       |
| <b>LPC1 + CST</b> | 12              | 1.58 ± 0.48 <sup>a,b</sup>                 | 1.43 ± 0.54 <sup>a,b</sup>               | 0.22 ± 0.21 <sup>a,b</sup>                 | 0 <sup>a,b</sup>         |
| <b>LPC2 + CST</b> | 12              | 0.22 ± 0.29 <sup>a,b</sup>                 | 0.75 ± 0.32 <sup>a,b</sup>               | 0.08 ± 0.12 <sup>a,b</sup>                 | 0 <sup>a,b</sup>         |

376 CTL, control (no treatment); LPC, lysophosphatidylcholine; CST, colistin; LPC1, one dose of lysophosphatidylcholine; LPC2 two doses of  
 377 lysophosphatidylcholine.

378 <sup>a</sup> *P*<0.05 compared to the controls

379 <sup>b</sup> *P*<0.05 compared to LPC group

380

381 **Table 3.** Therapeutic effect of one or two doses of LPC in combination with colistin in  
382 murine pneumonia model with *A. baumannii* Ab9.

| Treatment  | <i>n</i> | Lung                       | Blood                      | Mortality           |
|------------|----------|----------------------------|----------------------------|---------------------|
|            |          | (log <sub>10</sub> CFU/g)  | (log <sub>10</sub> CFU/ml) | (%)                 |
| CTL        | 8        | 9.64 ± 0.55                | 7.95 ± 0.83                | 87.5                |
| LPC        | 8        | 9.13 ± 0.28                | 7.27 ± 0.04                | 100                 |
| CST        | 8        | 3.11 ± 1.18 <sup>a,b</sup> | 2.14 ± 0.57 <sup>a,b</sup> | 12.5 <sup>a,b</sup> |
| LPC1 + CST | 8        | 2.88 ± 1.12 <sup>a,b</sup> | 1.87 ± 0.6 <sup>a,b</sup>  | 12.5 <sup>a,b</sup> |
| LPC2 + CST | 8        | 1.90 ± 1.13 <sup>a,b</sup> | 1.31 ± 0.80 <sup>a,b</sup> | 12.5 <sup>a,b</sup> |

383 CTL, control (no treatment); LPC, lysophosphatidylcholine; CST, colistin; LPC1,  
384 one dose of lysophosphatidylcholine; LPC2 two doses of lysophosphatidylcholine.

385 <sup>a</sup> *P*<0.05 compared to the controls

386 <sup>b</sup> *P*<0.05 compared to LPC group

387

388 **Table 4.** Therapeutic effect of one or two doses of LPC in combination with colistin in  
389 a murine pneumonia model with *A. baumannii* Ab186.

| Treatment  | n | Lung                       | Blood                      | Mortality        |
|------------|---|----------------------------|----------------------------|------------------|
|            |   | (log <sub>10</sub> CFU/g)  | (log <sub>10</sub> CFU/ml) | (%)              |
| CTL        | 8 | 9.21 ± 0.45                | 7.76 ± 0.39                | 100              |
| LPC        | 8 | 9.01 ± 0.07                | 7.33 ± 0.03                | 100              |
| CST        | 8 | 1.66 ± 0.49 <sup>a,b</sup> | 0.97 ± 0.30 <sup>a,b</sup> | 0 <sup>a,b</sup> |
| LPC1 + CST | 8 | 1.11 ± 0.54 <sup>a,b</sup> | 0.59 ± 0.29 <sup>a,b</sup> | 0 <sup>a,b</sup> |
| LPC2 + CST | 8 | 0.65 ± 0.43 <sup>a,b</sup> | 0.43 ± 0.28 <sup>a,b</sup> | 0 <sup>a,b</sup> |

390 CTL, control (no treatment); LPC, lysophosphatidylcholine; CST, colistin; LPC1,  
391 one dose of lysophosphatidylcholine; LPC2 two doses of lysophosphatidylcholine.

392 <sup>a</sup> *P*<0.05 compared to the controls

393 <sup>b</sup> *P*<0.05 compared to LPC group.

394
